# Supplementary material
Source: publisher site journal article supplement (https://www.dovepress.com/article/312897)
Supplement: Supplementary file 1 [file get_supplementary_file.php]

**APPENDIX**

**Instruction for respondents**

Social media includes Facebook, Instagram, TikTok, Snapchat, YouTube, Pinterest, and many other online social network platforms. Please choose the social network platforms you use most frequently and fill in the questionnaire according to your experience on these platforms.

Serwisy społecznościowe obejmują Facebook, Instagram, TikTok, Snapchat, YouTube, Pinterest, jak i inne internetowe platformy społecznościowe. Proszę wybrać serwisy społecznościowe, z których korzystasz najczęściej i wypełnić kwestionariusz zgodnie z Twoimi doświadczeniami w korzystaniu z tych platform.

1 = totally disagree (całkowcie się nie zgadzam);

2 = disagree (nie zgadzam się);

3 = partially disagree (raczej się nie zgadzam);

4 = neither agree nor disagree (trudno powiedzieć);

5 = partially agree (częściowo się zgadzam);

6 = agree (zgadzam się)

7 = totally agree (całkowicie się zgadzam)

| **1. I am frequently overwhelmed by the amount of information available on social media sites.**  Często czuję się przytłoczony(-a) ilością informacji dostępnych na portalach społecznościowych. |
| --- |
| **2. When searching for information on social media sites, I frequently just give up because there is too much to deal with.**  Szukając informacji w mediach społecznościowych często się poddaję, ponieważ jest ich zbyt wiele. |
| **3. I am likely to receive too much information when I am searching for something on social media sites.**  Kiedy szukam czegoś w serwisach społecznościowych, prawdopodobnie otrzymam za dużo informacji. |
| **4. I usually avoid using social media for having received too much information.**  Zdarza mi się unikać mediów społecznościowych, ponieważ udostępniają zbyt wiele wiadomości. |
| **5. I feel angry when I realize that social media has taken up too much of my time.**  Denerwuję się, gdy uświadamiam sobie, że media społecznościowe pochłaniają zbyt wiele mojego czasu. |
| **6. I always have no idea what I am going to post on social media.**  Często nie wiem, jakie wiadomości chcę opublikować. |
| **7. When I login a social media site, I**’**ll always forget whom I**’**ve intended to stalk on the site.**  Czasem, gdy bardzo chcę przeczytać czyjąś wiadomość, po zalogowaniu do serwisu społecznościowego zapominam, kogo szukałem(-am). |
| **8. I’m likely to forget the content of the status which I have intended to repost.**  Podczas odświeżania widzę treść, którą chcę opublikować ponownie, ale po chwili o tym zapominam. |
| **9. When I open a social media site, I may forget what I**’**ve intended to post on the social media site.**  Kiedy otwieram stronę mediów społecznościowych, często zapominam, co zamierzałem(-am) opublikować. |
| **10. It**’**s hard for me to come up with good ideas for updating status on social media sites.**  Trudno mi wymyślić dobre pomysły na aktualizację profilu w mediach społecznościowych. |
| **11. I feel annoyed when I find there is too much unread information on social media sites.**  Denerwuje mnie, gdy otwieram portale społecznościowe i mam mnóstwo nieprzeczytanych wiadomości. |
| **12. Functions in the social network (check-in, status updates, etc.) make me irritated.**  Irytują mnie niektóre funkcje w mediach społecznościowych (logowanie, aktualizacje statusu, itp.). |
| **13. I feel anxious when I was referred to (@) by others on the social media sites.**  Niepokoję się, kiedy ktoś oznacza (@) mnie w mediach społecznościowych. |
| **14. I feel nervous when receiving friend requests on social media sites.**  Czuję się zaniepokojony, kiedy otrzymuję nowe prośby o dodanie do znajomych. |
| **15. Before I login in my social media account, I usually fear of receiving too much new messages.**  Zanim zaloguję się na swoje konto w sieci społecznościowej, obawiam się, że otrzymam zbyt wiele nowych powiadomień. |
